# Supplementary material
Source: PubMed Central journal article supplement (PMC7878354)
Supplement: NIHMS1650337-supplement-Supplemental_Material.pdf [file NIHMS1650337-supplement-Supplemental_Material.pdf]

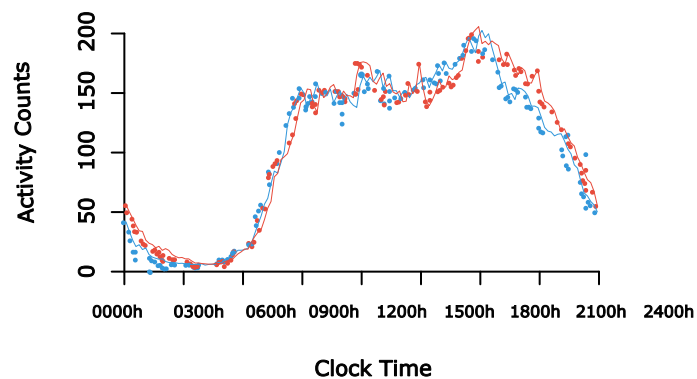

**Figure S1. Average Activity Counts in 10-Minute Intervals Across 24h in the Daytime and Delayed Eating Conditions, Related to Table 1 and to STAR Methods.** Time course plot showing average activity counts derived from actigraphy in 10-minute intervals across 24h in the daytime (blue dots) and delayed (red dots) eating conditions. As determined by cosinor analysis, there were no differences (for all measures, daytime values are presented first and delayed values are presented second) in amplitude ( $90.97 \pm 31.81$  vs  $90.14 \pm 33.37$ ,  $t = -0.361$ ,  $p = 0.73$ ,  $d = 0.11$ ) or mesor ( $113.27 \pm 40.17$  vs  $117.19 \pm 47.95$ ,  $t = 0.886$ ,  $p = 0.40$ ,  $d = 0.27$ ) between the two eating conditions, but acrophase showed a slight delay in the delayed eating condition ( $-4.09 \pm 0.18$ h vs  $-4.18 \pm 0.21$ h,  $t = -2.382$ ,  $p = 0.04$ ,  $d = 0.72$ ).

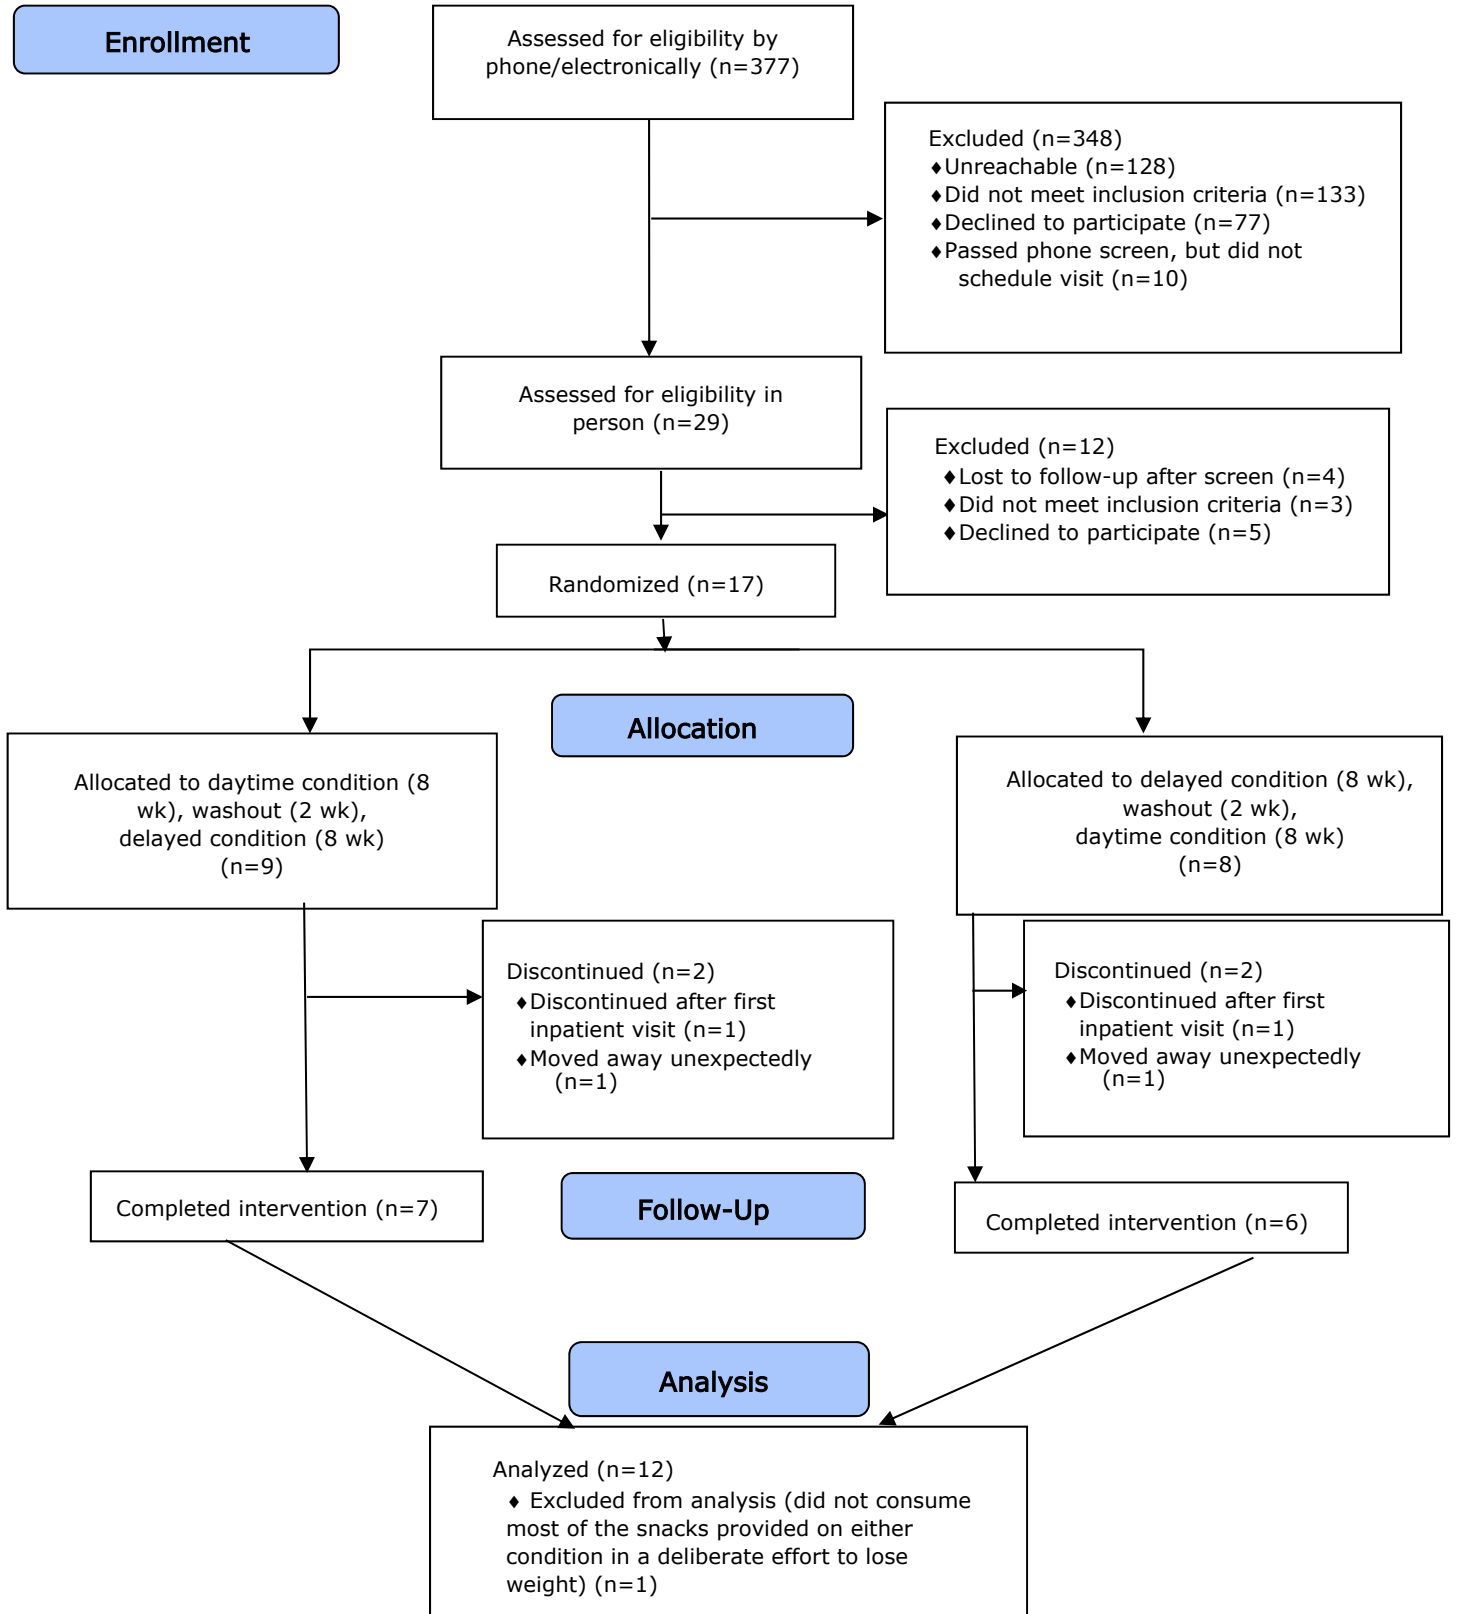

Figure S2. CONSORT Flow Diagram, Related to STAR Methods. CONSORT flow diagram for the study.

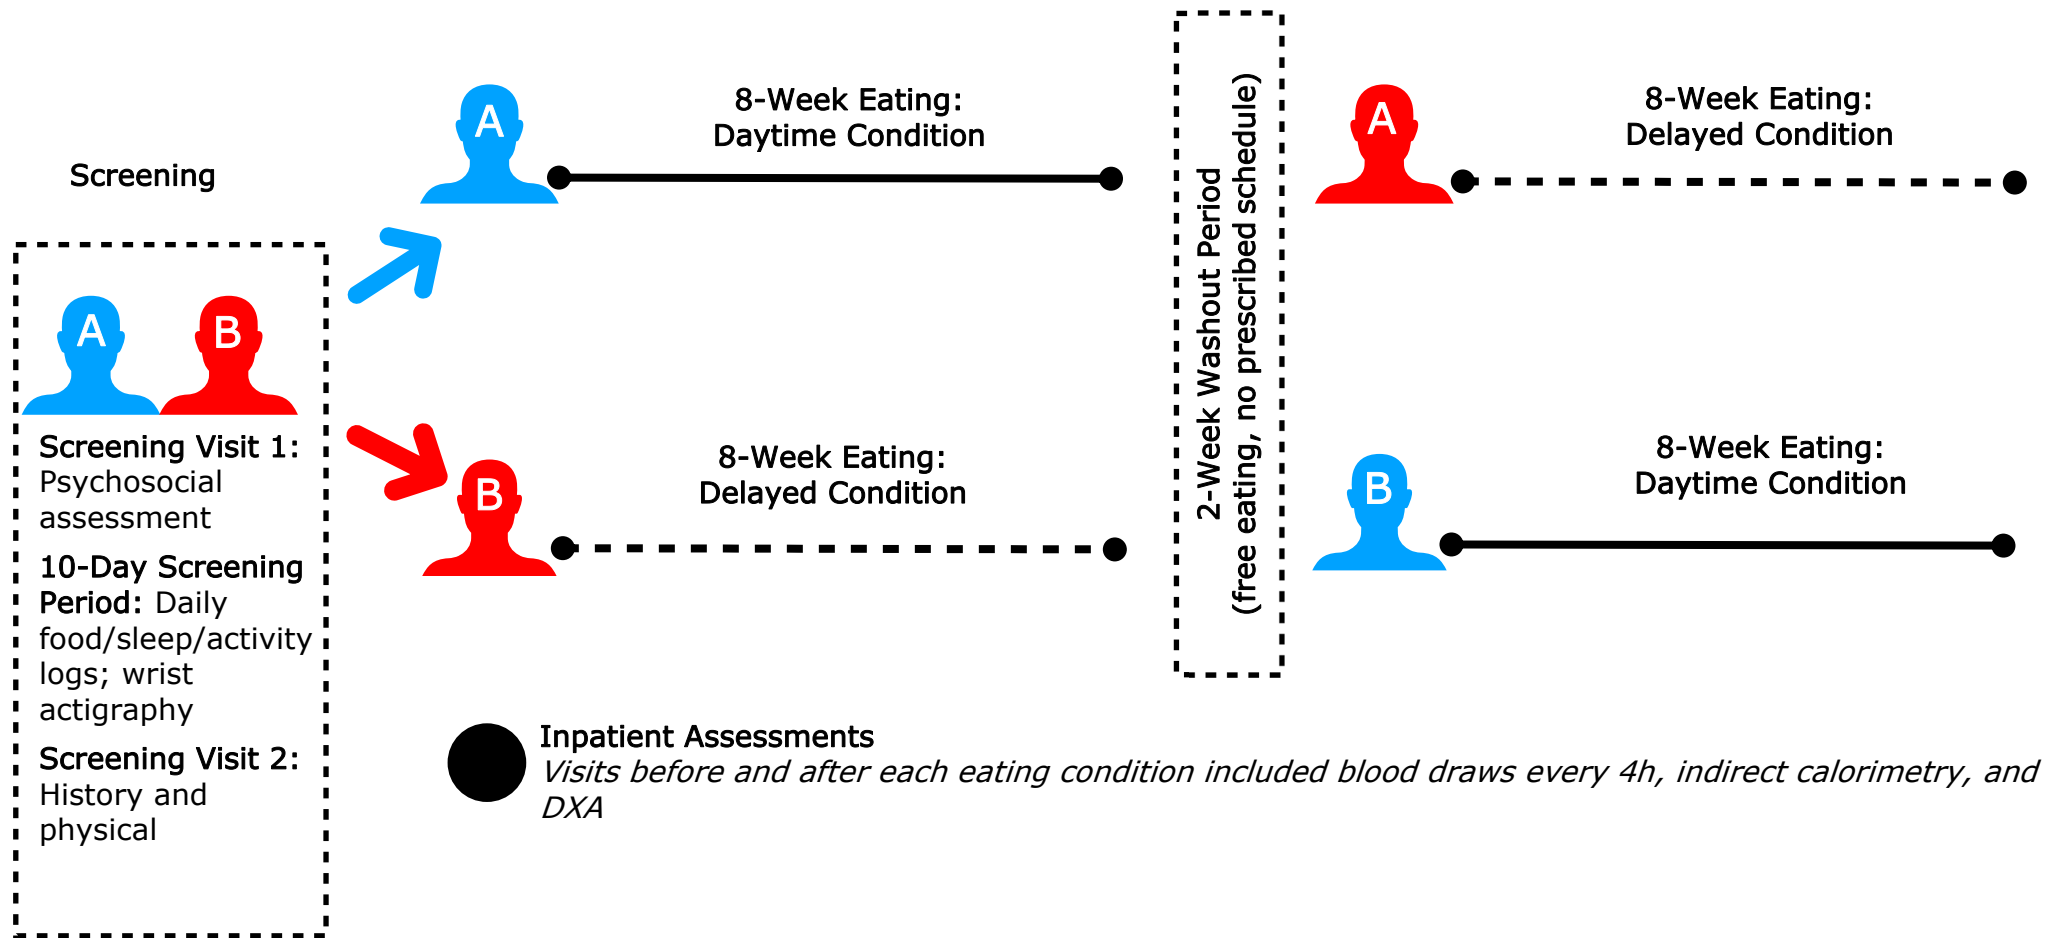

Figure S3. Study Timeline and Procedures, Related to STAR Methods. Timeline and procedures for the study. Daytime: blue, Delayed: red.
